# Supplementary material
Source: publisher site journal article supplement (https://www.dovepress.com/get_supplementary_file.php?f=484790.docx)
Supplement: Supplementary file 1 [file get_supplementary_file.php]

Table S1. Multifactor logistic regression analysis

| **Variable** | *B* | *S.E.* | *Wald* | *P* | *OR* | *95%CI* | |
| --- | --- | --- | --- | --- | --- | --- | --- |
| Lower Limit | Upper Limit |
| **Diabetes (%)** | 0.900 | 0.210 | 18.284 | 0.000 | 2.459 | 1.628 | 3.714 |
| Gender(%) | 0.247 | 0.210 | 1.383 | 0.240 | 1.280 | 0.848 | 1.931 |
| Age (years) | -0.006 | 0.012 | 0.246 | 0.620 | 0.994 | 0.971 | 1.018 |
| Blood Pressure (mmHg) | 0.633 | 0.210 | 18.284 | 0.000 | 2.459 | 1.628 | 3.714 |
| **Fatty Liver (%)** | 0.524 | 0.218 | 5.765 | 0.016 | 1.689 | 1.101 | 2.590 |
| Gender(%) | 0.231 | 0.208 | 1.241 | 0.265 | 1.260 | 0.839 | 1.893 |
| Age (years) | -0.004 | 0.012 | 0.124 | 0.725 | 0.996 | 0.973 | 1.019 |
| Blood Pressure (mmHg) | 0.663 | 0.151 | 19.189 | 0.000 | 1.940 | 1.442 | 2.610 |
| **Hyperlipidemia (%)** | 1.106 | 0.250 | 19.595 | 0.000 | 3.021 | 1.852 | 4.930 |
| Gender(%) | 0.195 | 0.211 | 0.854 | 0.355 | 1.215 | 0.804 | 1.835 |
| Age (years) | -0.003 | 0.012 | 0.071 | 0.790 | 0.997 | 0.973 | 1.021 |
| Blood Pressure (mmHg) | 0.65 | 0.152 | 18.207 | 0.000 | 1.916 | 1.421 | 2.584 |

*B*, beta coefficients. *S.E.*, standard error. *Wald*, Wald Chi-square value. *P*, p-value. *OR*, odds ratios. *95% CI*, 95% confidence intervals.
